# Supplementary material for: PEGylated Paclitaxel Nanomedicine Meets 3D Confinement: Cytotoxicity and Cell Behaviors
Source: MDPI journal article supplement (doi:10.3390/jfb14060322), 2023-06-15
Supplement: s1 [file s1]

## Supporting Information

# PEGylated Paclitaxel Nanomedicine Meets 3D Confinement: Cytotoxicity and Cell Behaviors

*Wenhai Lin,<sup>1,2,†</sup> Yuanhao Xu,<sup>1,2,†</sup> Xiao Hong,<sup>1,2</sup> and Stella W. Pang<sup>1,2,\*</sup>*

1 Department of Electrical Engineering, City University of Hong Kong, Hong Kong, China

2 Centre for Biosystems, Neuroscience, and Nanotechnology, City University of Hong Kong,  
Hong Kong, China

\* Correspondence: pang@cityu.edu.hk

† These authors contributed equally to this work.

**Supplementary Table S1.** Percentage of cell disruption for cells without any treatment for 16 h in different microwells.

| Microwell ( $\mu\text{m}^2$ ) | without cover (%) | with cover (%) |
|-------------------------------|-------------------|----------------|
| 50×50                         | 11.63±5.79        | 7.26±2.62      |
| 100×100                       | 11.43±4.57        | 6.61±2.65      |
| 150×150                       | 10.47±3.65        | 7.65±2.19      |

**Supplementary Table S2.** Percentage of cell disruption after PTX and PEG-PTX NPs addition for 16 h in different microwells. Concentration of PTX and PEG-PTX NPs were both 5.85 nmol/mL.

| Microwell ( $\mu\text{m}^2$ ) |         | Control (%) | PTX (%)    | PEG-PTX NPs (%) |
|-------------------------------|---------|-------------|------------|-----------------|
| without cover                 | 50×50   | 5.69±5.43   | 13.40±6.62 | 10.50±2.84      |
|                               | 100×100 | 4.42±3.50   | 14.01±3.66 | 10.77±3.92      |
|                               | 150×150 | 4.50±2.67   | 14.82±4.86 | 10.96±2.68      |
| with cover                    | 50×50   | 3.21±2.58   | 16.08±5.94 | 12.41±4.80      |
|                               | 100×100 | 2.41±2.15   | 13.12±3.44 | 12.23±5.26      |
|                               | 150×150 | 3.37±2.63   | 15.56±3.96 | 12.68±3.87      |

**Supplementary Table S3.** Migration speed of NPC43 cells with PTX and PEG-PTX NPs treatments over 16 h in different microwells and on flat surface. Concentration of PTX and PEG-PTX NPs were both 5.85 nmol/mL.

| Microwell ( $\mu\text{m}^2$ ) |                  | Control ( $\mu\text{m}/\text{min}$ ) | PTX ( $\mu\text{m}/\text{min}$ ) | PEG-PTX NPs ( $\mu\text{m}/\text{min}$ ) |
|-------------------------------|------------------|--------------------------------------|----------------------------------|------------------------------------------|
| without cover                 | Flat surface     | 0.32 $\pm$ 0.07                      | 0.10 $\pm$ 0.03                  | 0.17 $\pm$ 0.04                          |
|                               | 50 $\times$ 50   | 0.34 $\pm$ 0.08                      | 0.09 $\pm$ 0.03                  | 0.13 $\pm$ 0.04                          |
|                               | 100 $\times$ 100 | 0.33 $\pm$ 0.06                      | 0.09 $\pm$ 0.02                  | 0.13 $\pm$ 0.04                          |
|                               | 150 $\times$ 150 | 0.36 $\pm$ 0.09                      | 0.09 $\pm$ 0.03                  | 0.16 $\pm$ 0.04                          |
| with cover                    | 50 $\times$ 50   | 0.32 $\pm$ 0.07                      | 0.08 $\pm$ 0.02                  | 0.12 $\pm$ 0.03                          |
|                               | 100 $\times$ 100 | 0.32 $\pm$ 0.07                      | 0.10 $\pm$ 0.03                  | 0.11 $\pm$ 0.03                          |
|                               | 150 $\times$ 150 | 0.32 $\pm$ 0.07                      | 0.10 $\pm$ 0.03                  | 0.12 $\pm$ 0.04                          |

**Supplementary Table S4.** Cell area after cells treated with PTX and PEG-PTX NPs for 16 h in different microwells. Concentration of PTX and PEG-PTX NPs were both 5.85 nmol/mL.

| Microwell ( $\mu\text{m}^2$ ) |                  | Control ( $\mu\text{m}^2$ ) | PTX ( $\mu\text{m}^2$ ) | PEG-PTX NPs ( $\mu\text{m}^2$ ) |
|-------------------------------|------------------|-----------------------------|-------------------------|---------------------------------|
| without cover                 | 50 $\times$ 50   | 329 $\pm$ 162               | 119 $\pm$ 41            | 145 $\pm$ 40                    |
|                               | 100 $\times$ 100 | 345 $\pm$ 127               | 115 $\pm$ 39            | 165 $\pm$ 64                    |
|                               | 150 $\times$ 150 | 334 $\pm$ 115               | 116 $\pm$ 43            | 166 $\pm$ 68                    |
| with cover                    | 50 $\times$ 50   | 225 $\pm$ 88                | 114 $\pm$ 34            | 135 $\pm$ 39                    |
|                               | 100 $\times$ 100 | 216 $\pm$ 63                | 139 $\pm$ 44            | 135 $\pm$ 44                    |
|                               | 150 $\times$ 150 | 234 $\pm$ 64                | 152 $\pm$ 33            | 140 $\pm$ 52                    |

**Supplementary Table S5.** Cell aspect ratio after NPC43 cells treated with PTX and PEG-PTX NPs for 16 h in different microwells. Concentration of PTX and PEG-PTX NPs were both 5.85 nmol/mL.

| Microwell ( $\mu\text{m}^2$ ) |         | Control   | PTX       | PEG-PTX NPs |
|-------------------------------|---------|-----------|-----------|-------------|
| without cover                 | 50×50   | 1.77±0.65 | 1.31±0.20 | 1.55±0.35   |
|                               | 100×100 | 1.98±0.78 | 1.26±0.28 | 1.55±0.22   |
|                               | 150×150 | 1.79±0.58 | 1.22±0.43 | 1.60±0.30   |
| with cover                    | 50×50   | 1.93±0.78 | 1.22±0.18 | 1.31±0.22   |
|                               | 100×100 | 1.87±0.87 | 1.27±0.17 | 1.36±0.23   |
|                               | 150×150 | 1.71±0.47 | 1.21±0.16 | 1.29±0.20   |

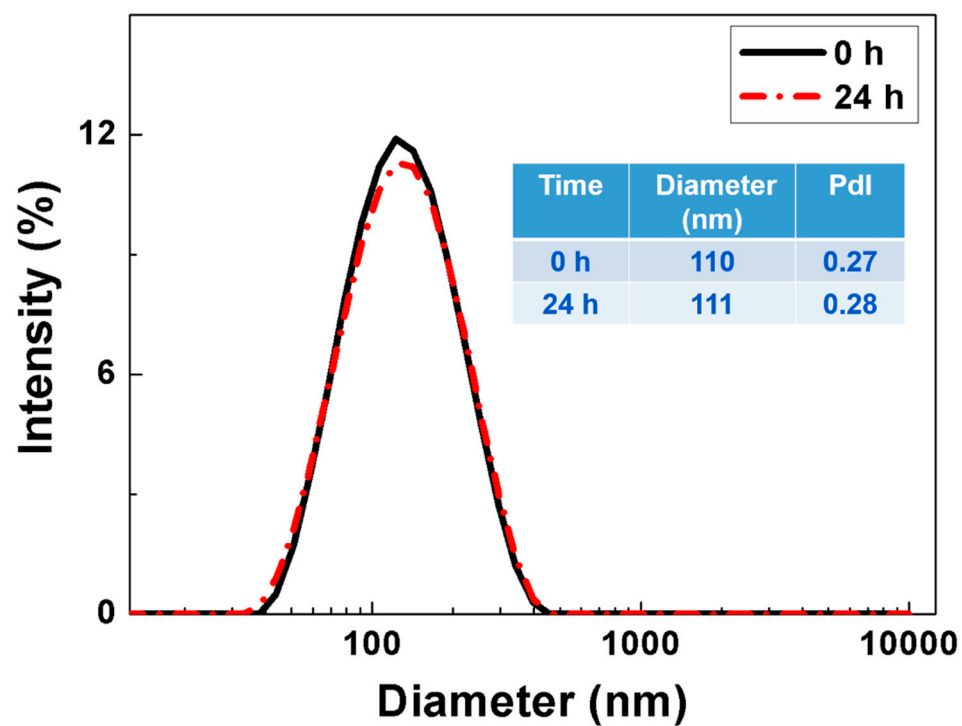

**Supplementary Figure S1.** Size distribution and stability of PEG-PTX NPs in cell culture medium measured by dynamic light scattering (DLS).

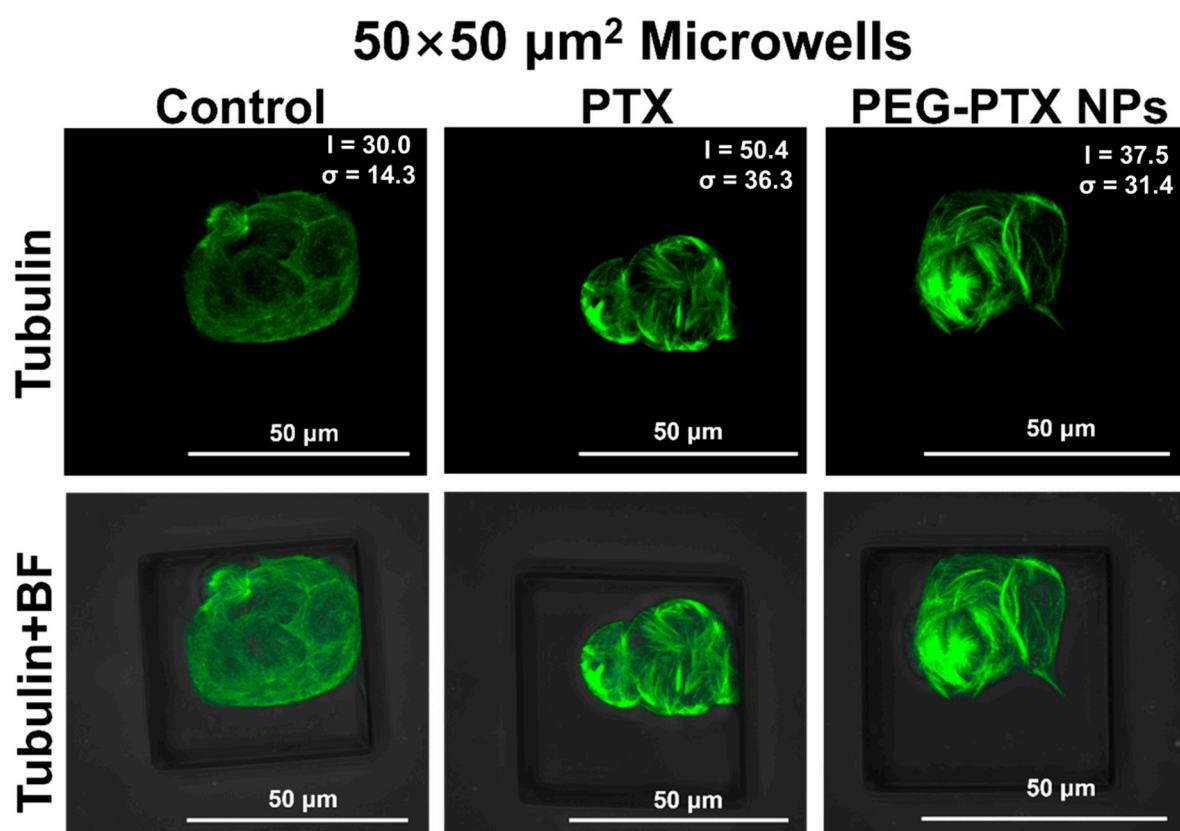

**Supplementary Figure S2.** Confocal laser scanning micrographs of NPC43 cells incubated with PTX and PEG-PTX NPs for 16 h in 50×50  $\mu\text{m}^2$  microwells. Tubulin in cells was stained by tubulin-tracker green (green fluorescence), and overlays of tubulin and bright field (BF) images. Average value ( $I$ ) and standard deviation ( $\sigma$ ) of fluorescent intensity were larger after drug treatment. Concentration of PTX and PEG-PTX NPs were both 5.85 nmol/mL.

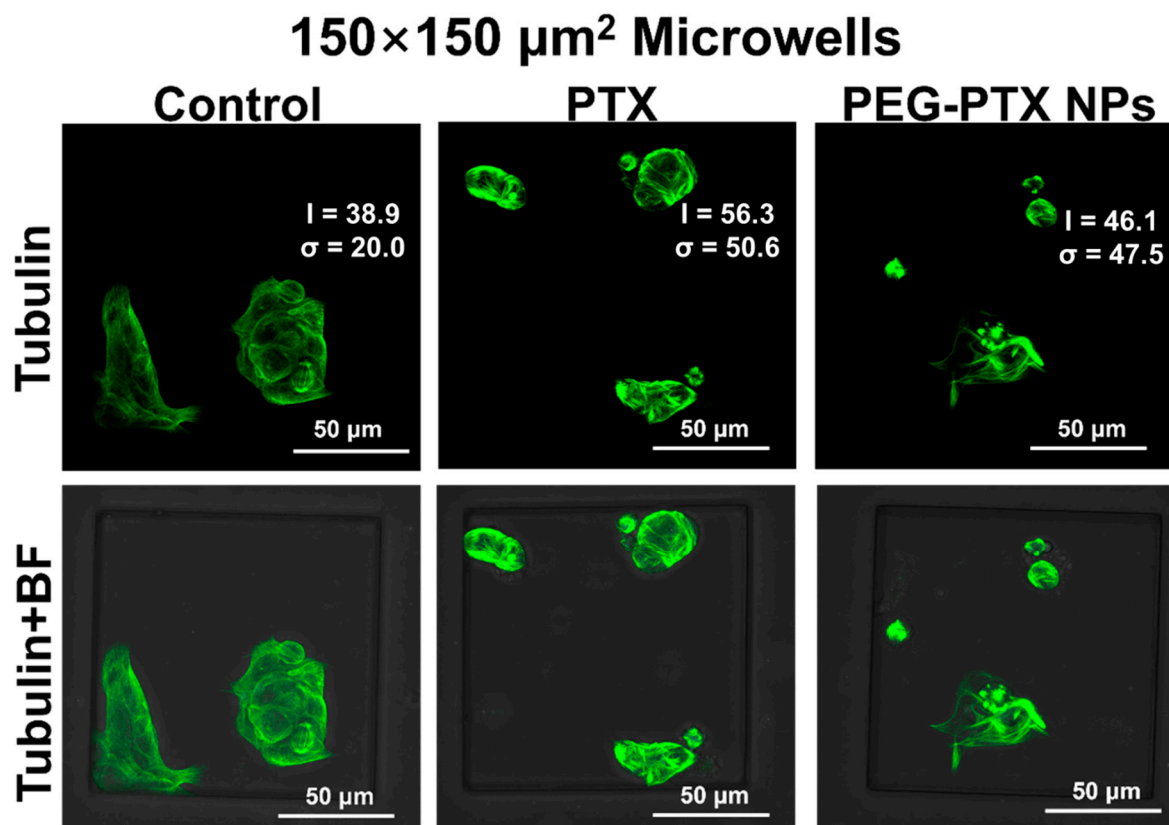

**Supplementary Figure S3.** Confocal laser scanning micrographs of NPC43 cells incubated with PTX and PEG-PTX NPs for 16 h in 150×150  $\mu\text{m}^2$  microwells. Tubulin in cells was stained by tubulin-tracker green (green fluorescence), and overlays of Tubulin and BF images. Average value ( $I$ ) and standard deviation ( $\sigma$ ) of fluorescent intensity were larger after drug treatment. Concentration of PTX and PEG-PTX NPs were both 5.85 nmol/mL.

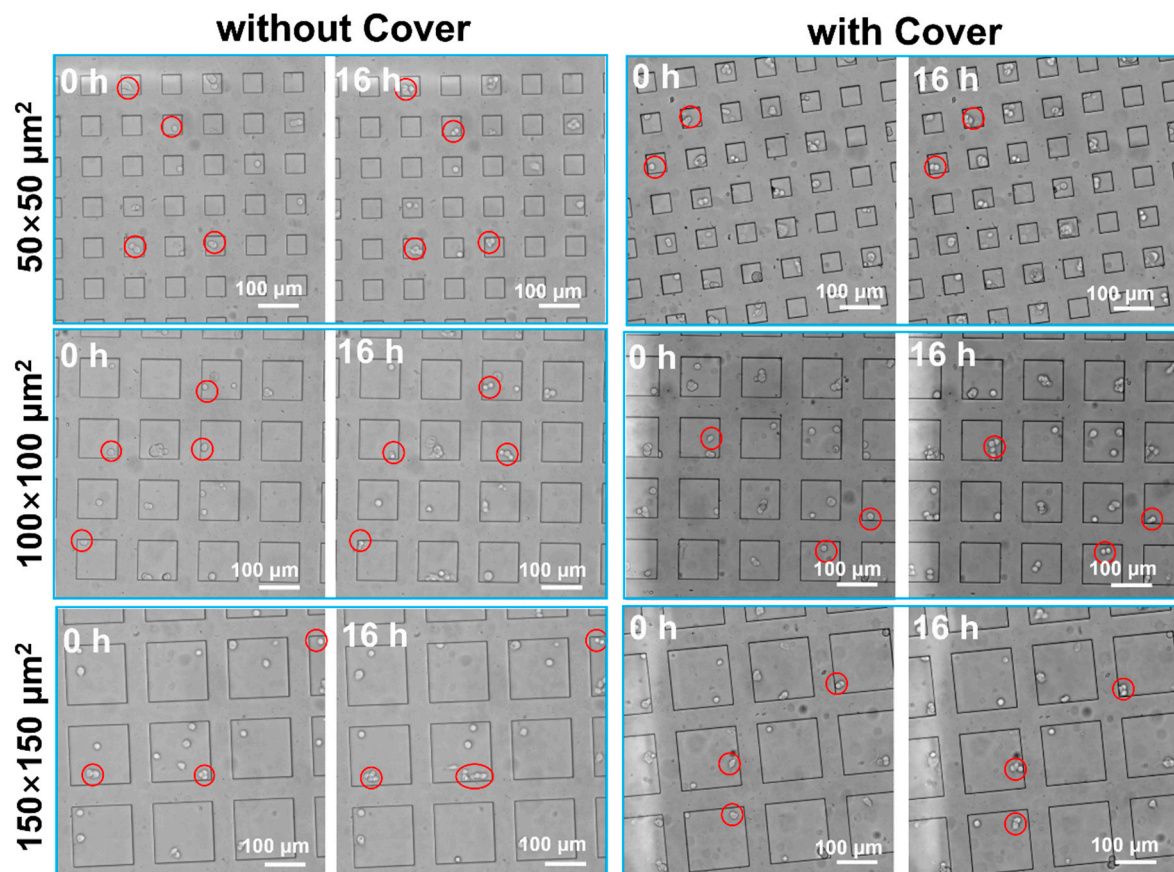

**Supplementary Figure S4.** Micrographs of NPC43 cells without any treatment for 16 h in microwells without and with cover. Cell division was highlighted in red circles.

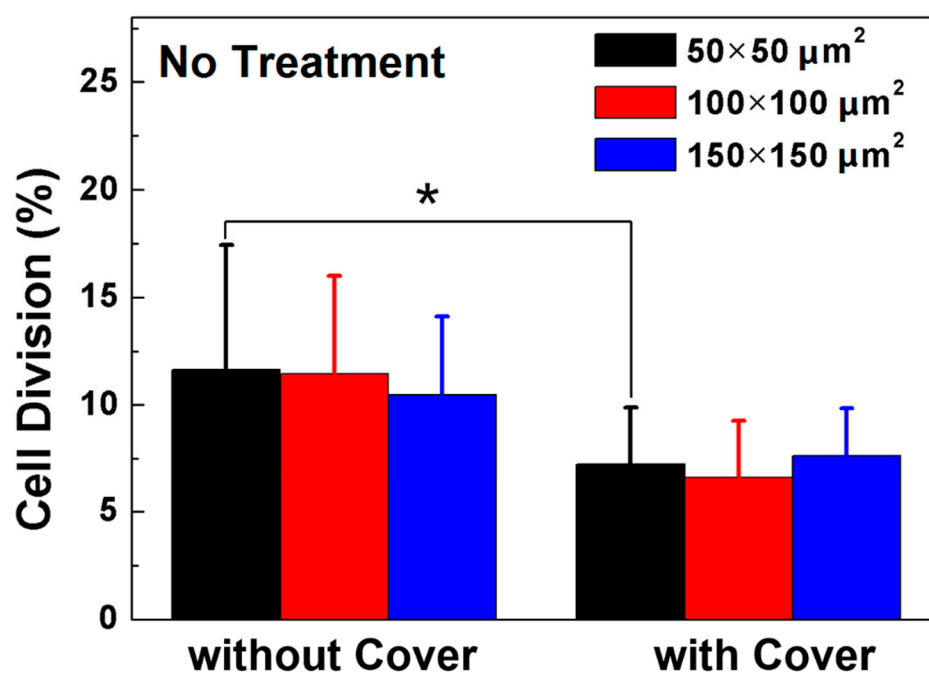

**Supplementary Figure S5.** Percentage of cell disruption for cells without any treatment for 16 h in different microwells. One-way ANOVA and Tukey's post hoc tests, \*p <0.05. Concentration of PTX and PEG-PTX NPs were both 5.85 nmol/mL.

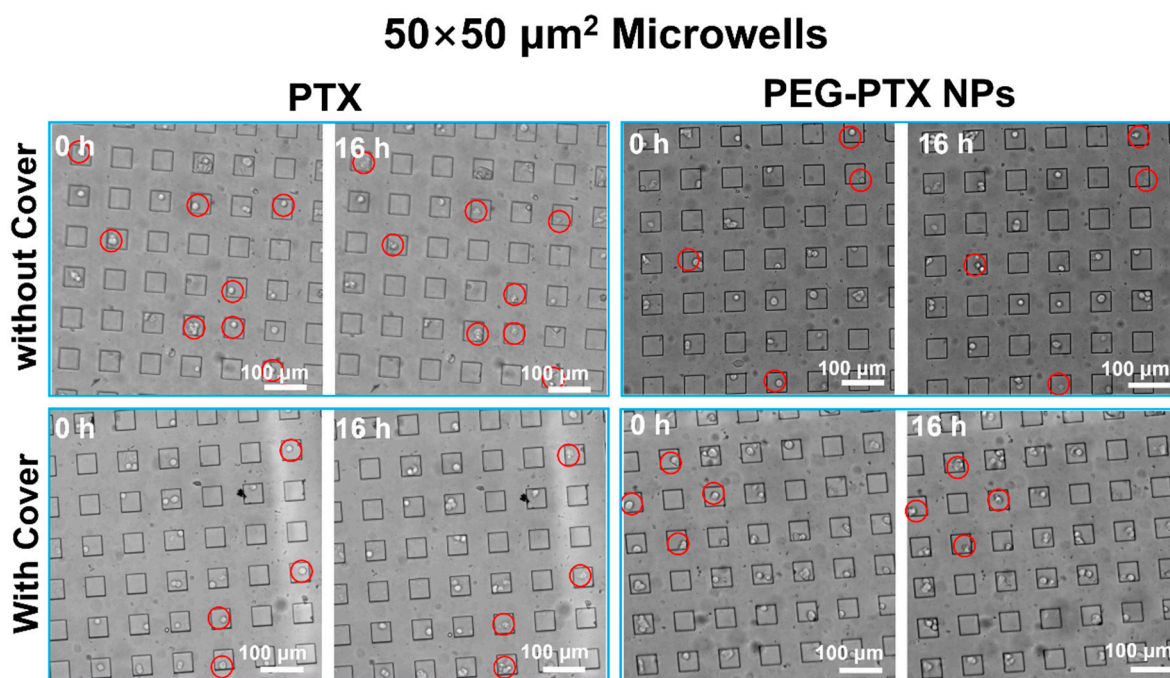

**Supplementary Figure S6.** Micrographs of NPC43 cells incubated with PTX or PEG-PTX NPs for 16 h in 50×50  $\mu\text{m}^2$  microwells. Cell disruption was highlighted in red circles. Concentration of PTX and PEG-PTX NPs were both 5.85 nmol/mL.

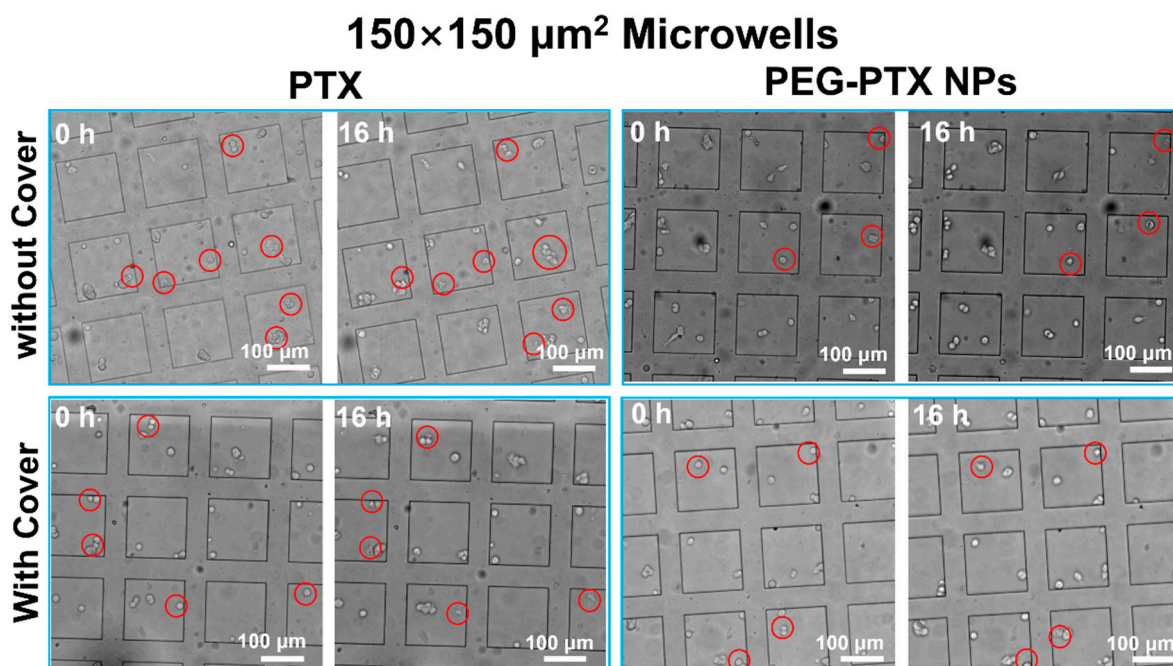

**Supplementary Figure S7.** Micrographs of NPC43 cells incubated with PTX or PEG-PTX NPs for 16 h in 150×150  $\mu\text{m}^2$  microwells. Cell disruption was highlighted in red circles. Concentration of PTX and PEG-PTX NPs were both 5.85 nmol/mL.

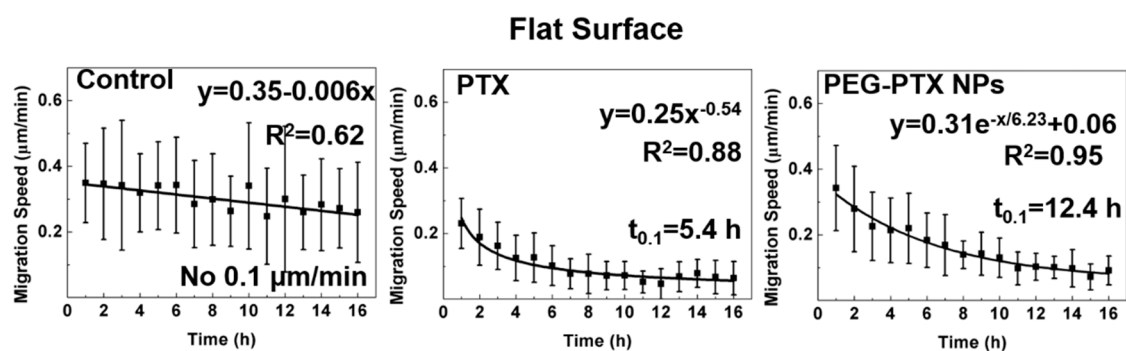

**Supplementary Figure S8.** Trends of NPC43 cell migration speed on flat surface after different treatments. These groups include control without any treatment, NPC43 cells treated with PTX, and NPC43 cells treated with PEG-PTX NPs.  $t_{0.1}$  represents time when migration speed was equal to 0.1  $\mu\text{m}/\text{min}$ . Concentration of PTX and PEG-PTX NPs were both 5.85 nmol/mL.

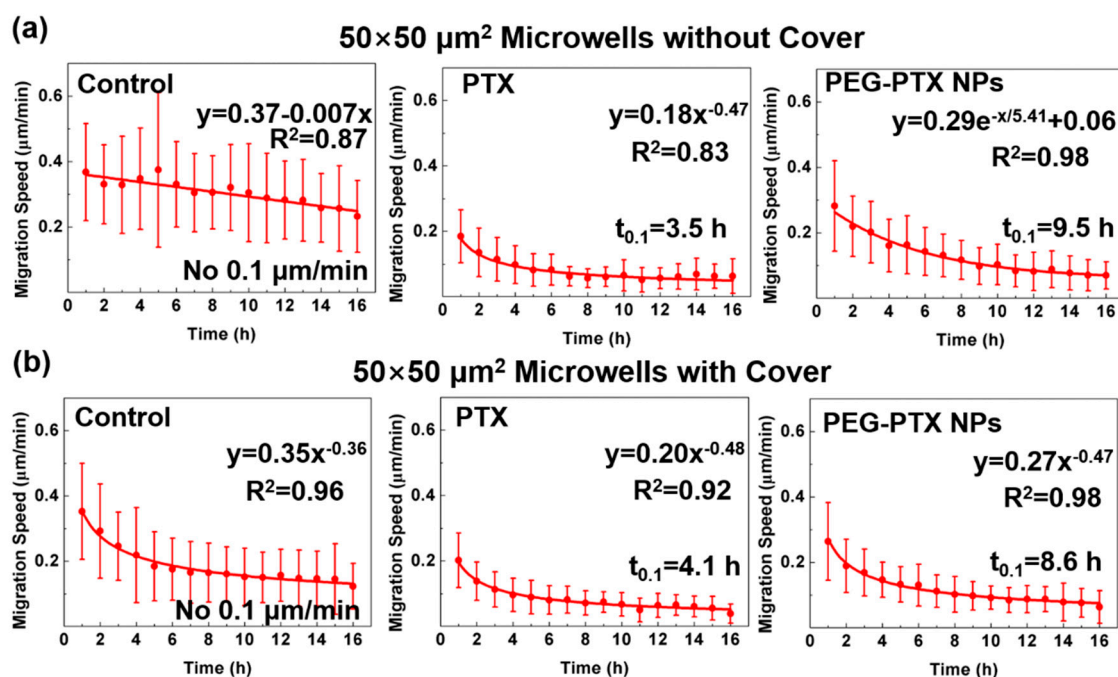

**Supplementary Figure S9.** Trends of NPC43 cell migration speed in 50×50  $\mu\text{m}^2$  microwells (a) without cover and (b) with cover after different treatments. These groups include control without any treatment, NPC43 cells treated with PTX, and NPC43 cells treated with PEG-PTX NPs.  $t_{0.1}$  represents time when migration speed was equal to 0.1  $\mu\text{m}/\text{min}$ . Concentration of PTX and PEG-PTX NPs were both 5.85 nmol/mL.

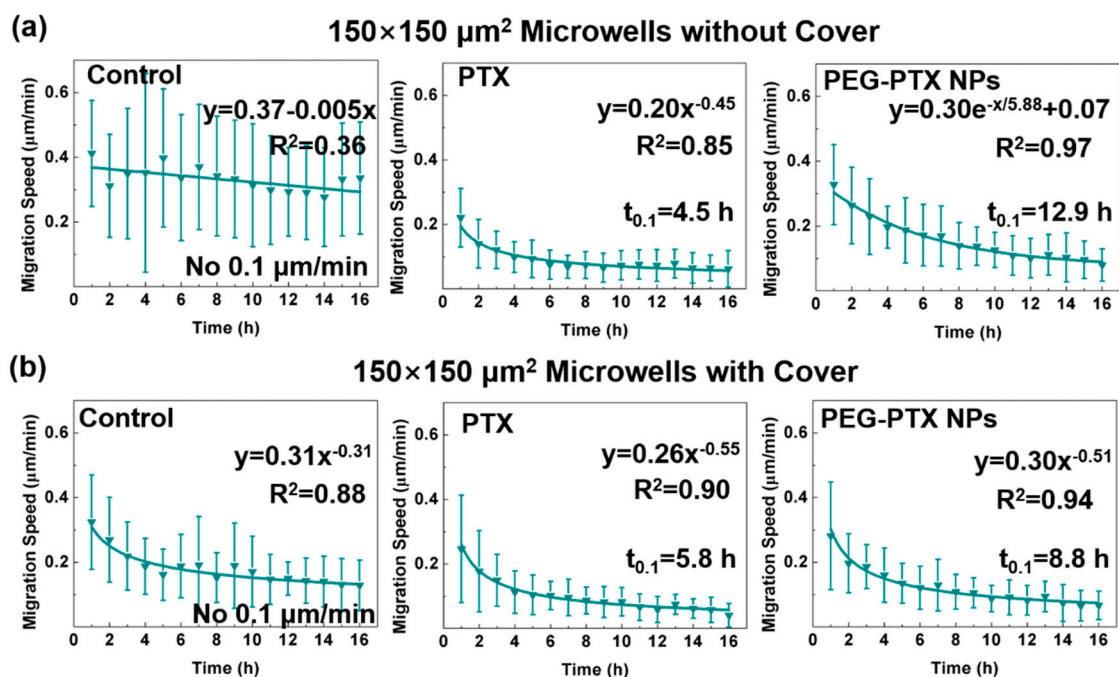

**Supplementary Figure S10.** Trends of NPC43 cell migration speed in 150×150  $\mu\text{m}^2$  microwells (a) without cover and (b) with cover after different treatments. These groups include control without any treatment, NPC43 cells treated with PTX, and NPC43 cells treated with PEG-PTX NPs.  $t_{0.1}$  represents time when migration speed was equal to 0.1  $\mu\text{m}/\text{min}$ . Concentration of PTX and PEG-PTX NPs were both 5.85 nmol/mL.

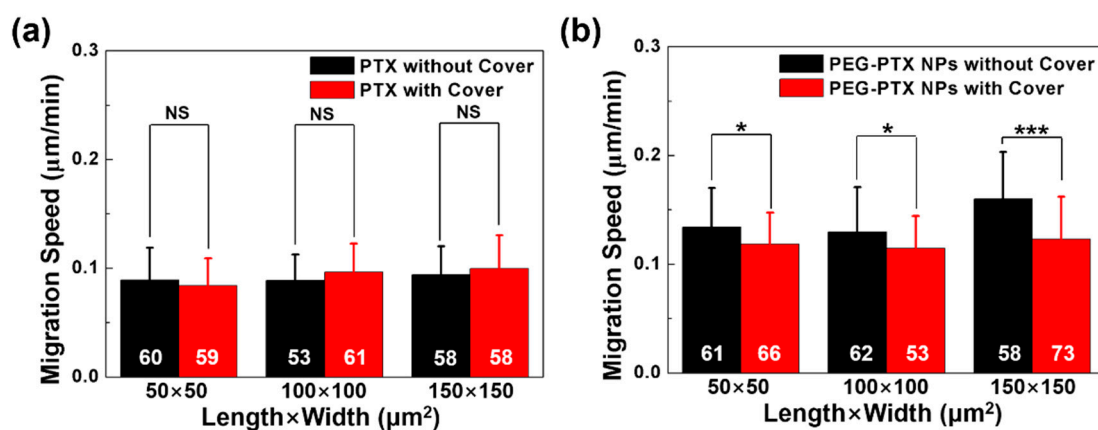

**Supplementary Figure S11.** NPC43 cell migration behavior in microwells with and without cover. (a) Migration speed of NPC43 cells with (a) PTX and (b) PEG-PTX NPs treatments over 16 h in microwells without cover and with cover. One-way ANOVA and Tukey's post hoc test, NS – not significant, \* $p < 0.05$ , and \*\*\* $p < 0.001$ . Number of NPC43 cells counted is marked in white. Concentration of PTX and PEG-PTX NPs were both 5.85 nmol/mL.

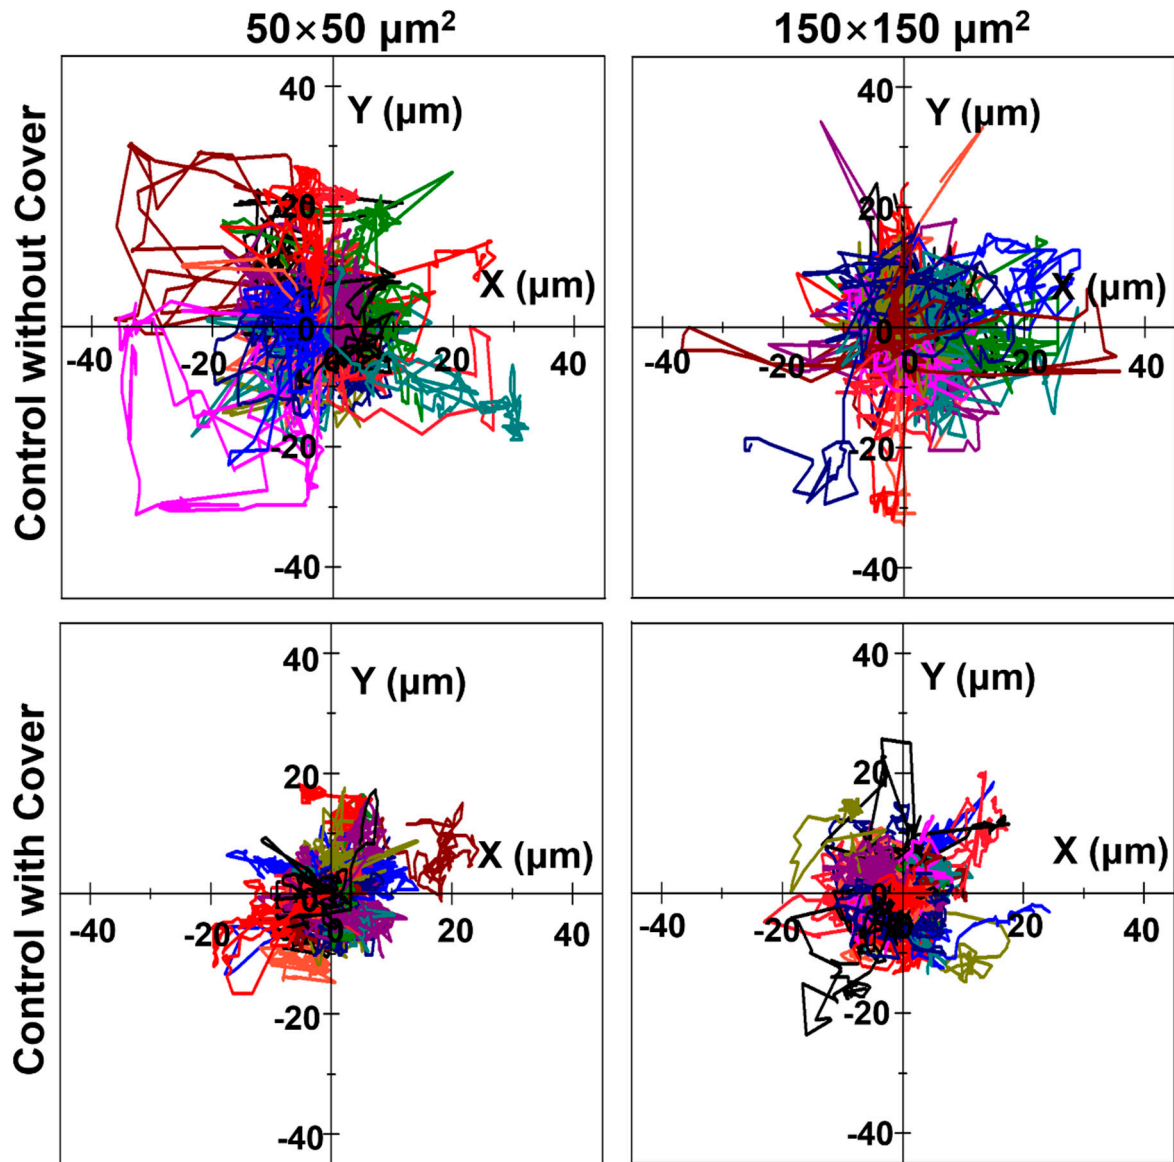

**Supplementary Figure S12.** Cell migration trajectories of NPC43 cells over 16 h without any treatment in  $50 \times 50$  and  $150 \times 150 \mu\text{m}^2$  microwells without and with cover. Starting points of cell migration trajectories are (0, 0).

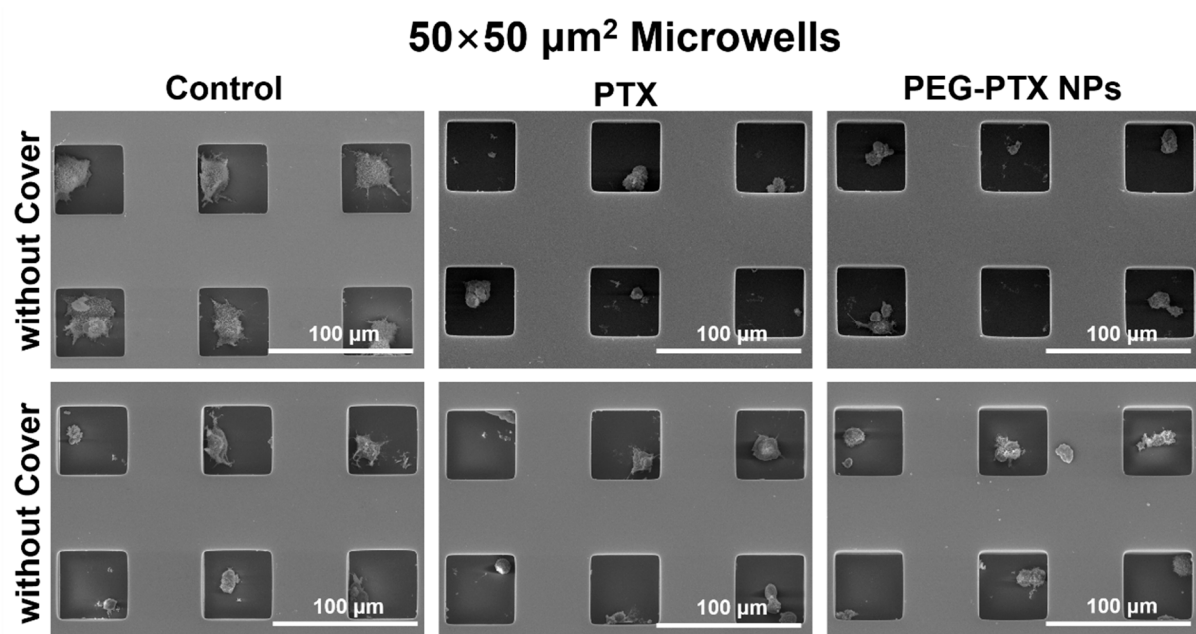

**Supplementary Figure S13.** Scanning electron micrographs of NPC43 cells with PTX and PEG-PTX NPs added over 16 h in 50×50  $\mu\text{m}^2$  microwells without and with cover. Concentration of PTX and PEG-PTX NPs were both 5.85 nmol/mL.

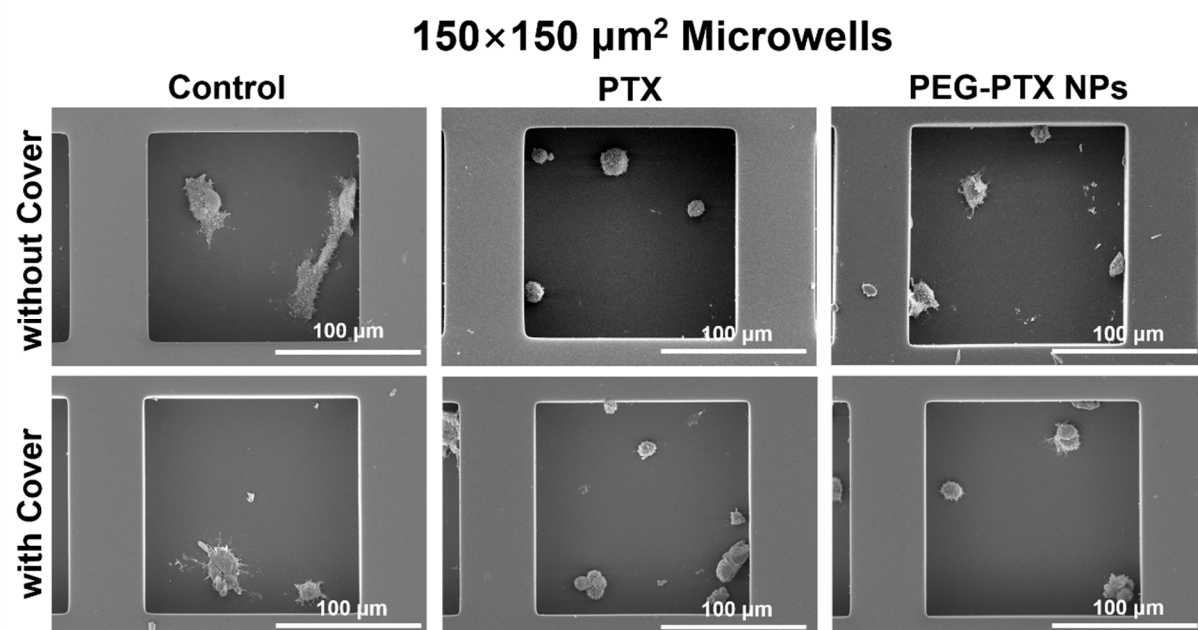

**Supplementary Figure S14.** Scanning electron micrographs of NPC43 cells with PTX and PEG-PTX NPs added over 16 h in 150×150  $\mu\text{m}^2$  microwells without and with cover. Concentration of PTX and PEG-PTX NPs were both 5.85 nmol/mL.

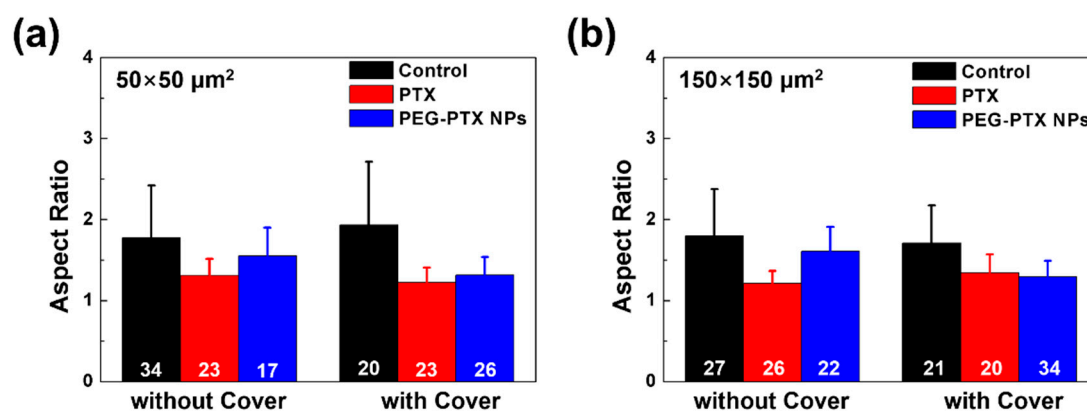

**Supplementary Figure S15.** Cell aspect ratio after NPC43 cells treated with PTX and PEG-PTX NPs for 16 h in (a) 50×50  $\mu\text{m}^2$  and (b) 150×150  $\mu\text{m}^2$  microwells without and with cover. Number of NPC43 cells counted is marked in white. Concentration of PTX and PEG-PTX NPs were both 5.85 nmol/mL.
